# Supplementary material for: The prevalence of diagnosed chronic conditions and multimorbidity in Australia: A method for estimating population prevalence from general practice patient encounter data
Source: PubMed Central journal article supplement (PMC5344344; doi:10.1371/journal.pone.0172935), 2017-03-09
Supplement: pone.0172935.s002.pdf [file pone.0172935.s002.pdf]

**BEACH (Bettering the Evaluation And Care of Health) - Morbidity and Treatment Survey - National**

© BEACH The University of Sydney 1996

DOC ID

|                                                          |                                                                   |                                                                                                                                                                                                                                                                                                                                                                                                                                                                                |                                                              |                           |  |  |                                                                                                                                                                                                                                                                                                                                                                               |
|----------------------------------------------------------|-------------------------------------------------------------------|--------------------------------------------------------------------------------------------------------------------------------------------------------------------------------------------------------------------------------------------------------------------------------------------------------------------------------------------------------------------------------------------------------------------------------------------------------------------------------|--------------------------------------------------------------|---------------------------|--|--|-------------------------------------------------------------------------------------------------------------------------------------------------------------------------------------------------------------------------------------------------------------------------------------------------------------------------------------------------------------------------------|
| Encounter Number                                         | Date of encounter<br>____/____/____                               | Date of Birth<br>____/____/____                                                                                                                                                                                                                                                                                                                                                                                                                                                | Sex<br>M <input type="checkbox"/> F <input type="checkbox"/> | Patient Postcode<br>_____ |  |  |                                                                                                                                                                                                                                                                                                                                                                               |
| <b>START Time</b><br><br>:<br>AM / PM<br>(please circle) | Patient Reasons for Encounter<br>1. _____<br>2. _____<br>3. _____ | <b>Yes / No</b><br>New Patient ..... <input type="checkbox"/> <input type="checkbox"/><br>Health Care/Benefits Card... <input type="checkbox"/> <input type="checkbox"/><br>Veterans Affairs Card..... <input type="checkbox"/> <input type="checkbox"/><br>NESB..... <input type="checkbox"/> <input type="checkbox"/><br>Aboriginal..... <input type="checkbox"/> <input type="checkbox"/><br>Torres Strait Islander ..... <input type="checkbox"/> <input type="checkbox"/> |                                                              |                           |  |  | PATIENT SEEN BY GP ..... <input type="checkbox"/><br>PATIENT NOT SEEN BY GP..... <input type="checkbox"/><br><b>Medicare</b><br>Item Nos: Home visit ..... <input type="checkbox"/><br>(if applicable)<br>1. _____ Workers comp paid..... <input type="checkbox"/><br>2. _____ Other paid ..... <input type="checkbox"/><br>3. _____ No charge ..... <input type="checkbox"/> |

| <b>Diagnosis/ Problem ① :</b><br>Problem Status<br>New <input type="checkbox"/> Old <input type="checkbox"/> Work related <input type="checkbox"/>                                                                                                                                                                                                                                                                                                                                                                                                                                                                                                                                                                                                                                                                             | <b>Diagnosis/ Problem ② :</b><br>Problem Status<br>New <input type="checkbox"/> Old <input type="checkbox"/> Work related <input type="checkbox"/> |                     |           |             |             |           |                            |                            |    |  |  |  |  |  |  |  |    |  |  |  |  |  |  |  |    |  |  |  |  |  |  |  |    |  |  |  |  |  |  |  |                                                                                                                                                                                                                                                                                                                                                                                                                                                                                                                                                                                                                                                                                                                                                                                                                                |                                     |                     |      |           |             |     |           |                            |    |  |  |  |  |  |  |  |    |  |  |  |  |  |  |  |    |  |  |  |  |  |  |  |    |  |  |  |  |  |  |  |
|--------------------------------------------------------------------------------------------------------------------------------------------------------------------------------------------------------------------------------------------------------------------------------------------------------------------------------------------------------------------------------------------------------------------------------------------------------------------------------------------------------------------------------------------------------------------------------------------------------------------------------------------------------------------------------------------------------------------------------------------------------------------------------------------------------------------------------|----------------------------------------------------------------------------------------------------------------------------------------------------|---------------------|-----------|-------------|-------------|-----------|----------------------------|----------------------------|----|--|--|--|--|--|--|--|----|--|--|--|--|--|--|--|----|--|--|--|--|--|--|--|----|--|--|--|--|--|--|--|--------------------------------------------------------------------------------------------------------------------------------------------------------------------------------------------------------------------------------------------------------------------------------------------------------------------------------------------------------------------------------------------------------------------------------------------------------------------------------------------------------------------------------------------------------------------------------------------------------------------------------------------------------------------------------------------------------------------------------------------------------------------------------------------------------------------------------|-------------------------------------|---------------------|------|-----------|-------------|-----|-----------|----------------------------|----|--|--|--|--|--|--|--|----|--|--|--|--|--|--|--|----|--|--|--|--|--|--|--|----|--|--|--|--|--|--|--|
| <table border="1" style="width:100%; border-collapse: collapse;"> <thead> <tr> <th style="width:20%;">Drug Name AND Form for this problem</th> <th style="width:5%;">Strength of product</th> <th style="width:5%;">Dose</th> <th style="width:5%;">Frequency</th> <th style="width:5%;">No. of Rpts</th> <th style="width:5%;">OTC</th> <th style="width:5%;">GP Supply</th> <th style="width:10%;">Drug status<br/>New   Cont.</th> </tr> </thead> <tbody> <tr><td>1.</td><td></td><td></td><td></td><td></td><td></td><td></td><td></td></tr> <tr><td>2.</td><td></td><td></td><td></td><td></td><td></td><td></td><td></td></tr> <tr><td>3.</td><td></td><td></td><td></td><td></td><td></td><td></td><td></td></tr> <tr><td>4.</td><td></td><td></td><td></td><td></td><td></td><td></td><td></td></tr> </tbody> </table> | Drug Name AND Form for this problem                                                                                                                | Strength of product | Dose      | Frequency   | No. of Rpts | OTC       | GP Supply                  | Drug status<br>New   Cont. | 1. |  |  |  |  |  |  |  | 2. |  |  |  |  |  |  |  | 3. |  |  |  |  |  |  |  | 4. |  |  |  |  |  |  |  | <table border="1" style="width:100%; border-collapse: collapse;"> <thead> <tr> <th style="width:20%;">Drug Name AND Form for this problem</th> <th style="width:5%;">Strength of product</th> <th style="width:5%;">Dose</th> <th style="width:5%;">Frequency</th> <th style="width:5%;">No. of Rpts</th> <th style="width:5%;">OTC</th> <th style="width:5%;">GP Supply</th> <th style="width:10%;">Drug status<br/>New   Cont.</th> </tr> </thead> <tbody> <tr><td>1.</td><td></td><td></td><td></td><td></td><td></td><td></td><td></td></tr> <tr><td>2.</td><td></td><td></td><td></td><td></td><td></td><td></td><td></td></tr> <tr><td>3.</td><td></td><td></td><td></td><td></td><td></td><td></td><td></td></tr> <tr><td>4.</td><td></td><td></td><td></td><td></td><td></td><td></td><td></td></tr> </tbody> </table> | Drug Name AND Form for this problem | Strength of product | Dose | Frequency | No. of Rpts | OTC | GP Supply | Drug status<br>New   Cont. | 1. |  |  |  |  |  |  |  | 2. |  |  |  |  |  |  |  | 3. |  |  |  |  |  |  |  | 4. |  |  |  |  |  |  |  |
| Drug Name AND Form for this problem                                                                                                                                                                                                                                                                                                                                                                                                                                                                                                                                                                                                                                                                                                                                                                                            | Strength of product                                                                                                                                | Dose                | Frequency | No. of Rpts | OTC         | GP Supply | Drug status<br>New   Cont. |                            |    |  |  |  |  |  |  |  |    |  |  |  |  |  |  |  |    |  |  |  |  |  |  |  |    |  |  |  |  |  |  |  |                                                                                                                                                                                                                                                                                                                                                                                                                                                                                                                                                                                                                                                                                                                                                                                                                                |                                     |                     |      |           |             |     |           |                            |    |  |  |  |  |  |  |  |    |  |  |  |  |  |  |  |    |  |  |  |  |  |  |  |    |  |  |  |  |  |  |  |
| 1.                                                                                                                                                                                                                                                                                                                                                                                                                                                                                                                                                                                                                                                                                                                                                                                                                             |                                                                                                                                                    |                     |           |             |             |           |                            |                            |    |  |  |  |  |  |  |  |    |  |  |  |  |  |  |  |    |  |  |  |  |  |  |  |    |  |  |  |  |  |  |  |                                                                                                                                                                                                                                                                                                                                                                                                                                                                                                                                                                                                                                                                                                                                                                                                                                |                                     |                     |      |           |             |     |           |                            |    |  |  |  |  |  |  |  |    |  |  |  |  |  |  |  |    |  |  |  |  |  |  |  |    |  |  |  |  |  |  |  |
| 2.                                                                                                                                                                                                                                                                                                                                                                                                                                                                                                                                                                                                                                                                                                                                                                                                                             |                                                                                                                                                    |                     |           |             |             |           |                            |                            |    |  |  |  |  |  |  |  |    |  |  |  |  |  |  |  |    |  |  |  |  |  |  |  |    |  |  |  |  |  |  |  |                                                                                                                                                                                                                                                                                                                                                                                                                                                                                                                                                                                                                                                                                                                                                                                                                                |                                     |                     |      |           |             |     |           |                            |    |  |  |  |  |  |  |  |    |  |  |  |  |  |  |  |    |  |  |  |  |  |  |  |    |  |  |  |  |  |  |  |
| 3.                                                                                                                                                                                                                                                                                                                                                                                                                                                                                                                                                                                                                                                                                                                                                                                                                             |                                                                                                                                                    |                     |           |             |             |           |                            |                            |    |  |  |  |  |  |  |  |    |  |  |  |  |  |  |  |    |  |  |  |  |  |  |  |    |  |  |  |  |  |  |  |                                                                                                                                                                                                                                                                                                                                                                                                                                                                                                                                                                                                                                                                                                                                                                                                                                |                                     |                     |      |           |             |     |           |                            |    |  |  |  |  |  |  |  |    |  |  |  |  |  |  |  |    |  |  |  |  |  |  |  |    |  |  |  |  |  |  |  |
| 4.                                                                                                                                                                                                                                                                                                                                                                                                                                                                                                                                                                                                                                                                                                                                                                                                                             |                                                                                                                                                    |                     |           |             |             |           |                            |                            |    |  |  |  |  |  |  |  |    |  |  |  |  |  |  |  |    |  |  |  |  |  |  |  |    |  |  |  |  |  |  |  |                                                                                                                                                                                                                                                                                                                                                                                                                                                                                                                                                                                                                                                                                                                                                                                                                                |                                     |                     |      |           |             |     |           |                            |    |  |  |  |  |  |  |  |    |  |  |  |  |  |  |  |    |  |  |  |  |  |  |  |    |  |  |  |  |  |  |  |
| Drug Name AND Form for this problem                                                                                                                                                                                                                                                                                                                                                                                                                                                                                                                                                                                                                                                                                                                                                                                            | Strength of product                                                                                                                                | Dose                | Frequency | No. of Rpts | OTC         | GP Supply | Drug status<br>New   Cont. |                            |    |  |  |  |  |  |  |  |    |  |  |  |  |  |  |  |    |  |  |  |  |  |  |  |    |  |  |  |  |  |  |  |                                                                                                                                                                                                                                                                                                                                                                                                                                                                                                                                                                                                                                                                                                                                                                                                                                |                                     |                     |      |           |             |     |           |                            |    |  |  |  |  |  |  |  |    |  |  |  |  |  |  |  |    |  |  |  |  |  |  |  |    |  |  |  |  |  |  |  |
| 1.                                                                                                                                                                                                                                                                                                                                                                                                                                                                                                                                                                                                                                                                                                                                                                                                                             |                                                                                                                                                    |                     |           |             |             |           |                            |                            |    |  |  |  |  |  |  |  |    |  |  |  |  |  |  |  |    |  |  |  |  |  |  |  |    |  |  |  |  |  |  |  |                                                                                                                                                                                                                                                                                                                                                                                                                                                                                                                                                                                                                                                                                                                                                                                                                                |                                     |                     |      |           |             |     |           |                            |    |  |  |  |  |  |  |  |    |  |  |  |  |  |  |  |    |  |  |  |  |  |  |  |    |  |  |  |  |  |  |  |
| 2.                                                                                                                                                                                                                                                                                                                                                                                                                                                                                                                                                                                                                                                                                                                                                                                                                             |                                                                                                                                                    |                     |           |             |             |           |                            |                            |    |  |  |  |  |  |  |  |    |  |  |  |  |  |  |  |    |  |  |  |  |  |  |  |    |  |  |  |  |  |  |  |                                                                                                                                                                                                                                                                                                                                                                                                                                                                                                                                                                                                                                                                                                                                                                                                                                |                                     |                     |      |           |             |     |           |                            |    |  |  |  |  |  |  |  |    |  |  |  |  |  |  |  |    |  |  |  |  |  |  |  |    |  |  |  |  |  |  |  |
| 3.                                                                                                                                                                                                                                                                                                                                                                                                                                                                                                                                                                                                                                                                                                                                                                                                                             |                                                                                                                                                    |                     |           |             |             |           |                            |                            |    |  |  |  |  |  |  |  |    |  |  |  |  |  |  |  |    |  |  |  |  |  |  |  |    |  |  |  |  |  |  |  |                                                                                                                                                                                                                                                                                                                                                                                                                                                                                                                                                                                                                                                                                                                                                                                                                                |                                     |                     |      |           |             |     |           |                            |    |  |  |  |  |  |  |  |    |  |  |  |  |  |  |  |    |  |  |  |  |  |  |  |    |  |  |  |  |  |  |  |
| 4.                                                                                                                                                                                                                                                                                                                                                                                                                                                                                                                                                                                                                                                                                                                                                                                                                             |                                                                                                                                                    |                     |           |             |             |           |                            |                            |    |  |  |  |  |  |  |  |    |  |  |  |  |  |  |  |    |  |  |  |  |  |  |  |    |  |  |  |  |  |  |  |                                                                                                                                                                                                                                                                                                                                                                                                                                                                                                                                                                                                                                                                                                                                                                                                                                |                                     |                     |      |           |             |     |           |                            |    |  |  |  |  |  |  |  |    |  |  |  |  |  |  |  |    |  |  |  |  |  |  |  |    |  |  |  |  |  |  |  |

|                                                                                                                                                                        |                                                                                                                                                                        |
|------------------------------------------------------------------------------------------------------------------------------------------------------------------------|------------------------------------------------------------------------------------------------------------------------------------------------------------------------|
| Procedures, other treatments, counselling this consult for this problem<br>1. _____ Prac Nurse? <input type="checkbox"/> 2. _____ Prac Nurse? <input type="checkbox"/> | Procedures, other treatments, counselling this consult for this problem<br>1. _____ Prac Nurse? <input type="checkbox"/> 2. _____ Prac Nurse? <input type="checkbox"/> |
|------------------------------------------------------------------------------------------------------------------------------------------------------------------------|------------------------------------------------------------------------------------------------------------------------------------------------------------------------|

| <b>Diagnosis/ Problem ③ :</b><br>Problem Status<br>New <input type="checkbox"/> Old <input type="checkbox"/> Work related <input type="checkbox"/>                                                                                                                                                                                                                                                                                                                                                                                                                                                                                                                                                                                                                                                                             | <b>Diagnosis/ Problem ④ :</b><br>Problem Status<br>New <input type="checkbox"/> Old <input type="checkbox"/> Work related <input type="checkbox"/> |                     |           |             |             |           |                            |                            |    |  |  |  |  |  |  |  |    |  |  |  |  |  |  |  |    |  |  |  |  |  |  |  |    |  |  |  |  |  |  |  |                                                                                                                                                                                                                                                                                                                                                                                                                                                                                                                                                                                                                                                                                                                                                                                                                                |                                     |                     |      |           |             |     |           |                            |    |  |  |  |  |  |  |  |    |  |  |  |  |  |  |  |    |  |  |  |  |  |  |  |    |  |  |  |  |  |  |  |
|--------------------------------------------------------------------------------------------------------------------------------------------------------------------------------------------------------------------------------------------------------------------------------------------------------------------------------------------------------------------------------------------------------------------------------------------------------------------------------------------------------------------------------------------------------------------------------------------------------------------------------------------------------------------------------------------------------------------------------------------------------------------------------------------------------------------------------|----------------------------------------------------------------------------------------------------------------------------------------------------|---------------------|-----------|-------------|-------------|-----------|----------------------------|----------------------------|----|--|--|--|--|--|--|--|----|--|--|--|--|--|--|--|----|--|--|--|--|--|--|--|----|--|--|--|--|--|--|--|--------------------------------------------------------------------------------------------------------------------------------------------------------------------------------------------------------------------------------------------------------------------------------------------------------------------------------------------------------------------------------------------------------------------------------------------------------------------------------------------------------------------------------------------------------------------------------------------------------------------------------------------------------------------------------------------------------------------------------------------------------------------------------------------------------------------------------|-------------------------------------|---------------------|------|-----------|-------------|-----|-----------|----------------------------|----|--|--|--|--|--|--|--|----|--|--|--|--|--|--|--|----|--|--|--|--|--|--|--|----|--|--|--|--|--|--|--|
| <table border="1" style="width:100%; border-collapse: collapse;"> <thead> <tr> <th style="width:20%;">Drug Name AND Form for this problem</th> <th style="width:5%;">Strength of product</th> <th style="width:5%;">Dose</th> <th style="width:5%;">Frequency</th> <th style="width:5%;">No. of Rpts</th> <th style="width:5%;">OTC</th> <th style="width:5%;">GP Supply</th> <th style="width:10%;">Drug status<br/>New   Cont.</th> </tr> </thead> <tbody> <tr><td>1.</td><td></td><td></td><td></td><td></td><td></td><td></td><td></td></tr> <tr><td>2.</td><td></td><td></td><td></td><td></td><td></td><td></td><td></td></tr> <tr><td>3.</td><td></td><td></td><td></td><td></td><td></td><td></td><td></td></tr> <tr><td>4.</td><td></td><td></td><td></td><td></td><td></td><td></td><td></td></tr> </tbody> </table> | Drug Name AND Form for this problem                                                                                                                | Strength of product | Dose      | Frequency   | No. of Rpts | OTC       | GP Supply                  | Drug status<br>New   Cont. | 1. |  |  |  |  |  |  |  | 2. |  |  |  |  |  |  |  | 3. |  |  |  |  |  |  |  | 4. |  |  |  |  |  |  |  | <table border="1" style="width:100%; border-collapse: collapse;"> <thead> <tr> <th style="width:20%;">Drug Name AND Form for this problem</th> <th style="width:5%;">Strength of product</th> <th style="width:5%;">Dose</th> <th style="width:5%;">Frequency</th> <th style="width:5%;">No. of Rpts</th> <th style="width:5%;">OTC</th> <th style="width:5%;">GP Supply</th> <th style="width:10%;">Drug status<br/>New   Cont.</th> </tr> </thead> <tbody> <tr><td>1.</td><td></td><td></td><td></td><td></td><td></td><td></td><td></td></tr> <tr><td>2.</td><td></td><td></td><td></td><td></td><td></td><td></td><td></td></tr> <tr><td>3.</td><td></td><td></td><td></td><td></td><td></td><td></td><td></td></tr> <tr><td>4.</td><td></td><td></td><td></td><td></td><td></td><td></td><td></td></tr> </tbody> </table> | Drug Name AND Form for this problem | Strength of product | Dose | Frequency | No. of Rpts | OTC | GP Supply | Drug status<br>New   Cont. | 1. |  |  |  |  |  |  |  | 2. |  |  |  |  |  |  |  | 3. |  |  |  |  |  |  |  | 4. |  |  |  |  |  |  |  |
| Drug Name AND Form for this problem                                                                                                                                                                                                                                                                                                                                                                                                                                                                                                                                                                                                                                                                                                                                                                                            | Strength of product                                                                                                                                | Dose                | Frequency | No. of Rpts | OTC         | GP Supply | Drug status<br>New   Cont. |                            |    |  |  |  |  |  |  |  |    |  |  |  |  |  |  |  |    |  |  |  |  |  |  |  |    |  |  |  |  |  |  |  |                                                                                                                                                                                                                                                                                                                                                                                                                                                                                                                                                                                                                                                                                                                                                                                                                                |                                     |                     |      |           |             |     |           |                            |    |  |  |  |  |  |  |  |    |  |  |  |  |  |  |  |    |  |  |  |  |  |  |  |    |  |  |  |  |  |  |  |
| 1.                                                                                                                                                                                                                                                                                                                                                                                                                                                                                                                                                                                                                                                                                                                                                                                                                             |                                                                                                                                                    |                     |           |             |             |           |                            |                            |    |  |  |  |  |  |  |  |    |  |  |  |  |  |  |  |    |  |  |  |  |  |  |  |    |  |  |  |  |  |  |  |                                                                                                                                                                                                                                                                                                                                                                                                                                                                                                                                                                                                                                                                                                                                                                                                                                |                                     |                     |      |           |             |     |           |                            |    |  |  |  |  |  |  |  |    |  |  |  |  |  |  |  |    |  |  |  |  |  |  |  |    |  |  |  |  |  |  |  |
| 2.                                                                                                                                                                                                                                                                                                                                                                                                                                                                                                                                                                                                                                                                                                                                                                                                                             |                                                                                                                                                    |                     |           |             |             |           |                            |                            |    |  |  |  |  |  |  |  |    |  |  |  |  |  |  |  |    |  |  |  |  |  |  |  |    |  |  |  |  |  |  |  |                                                                                                                                                                                                                                                                                                                                                                                                                                                                                                                                                                                                                                                                                                                                                                                                                                |                                     |                     |      |           |             |     |           |                            |    |  |  |  |  |  |  |  |    |  |  |  |  |  |  |  |    |  |  |  |  |  |  |  |    |  |  |  |  |  |  |  |
| 3.                                                                                                                                                                                                                                                                                                                                                                                                                                                                                                                                                                                                                                                                                                                                                                                                                             |                                                                                                                                                    |                     |           |             |             |           |                            |                            |    |  |  |  |  |  |  |  |    |  |  |  |  |  |  |  |    |  |  |  |  |  |  |  |    |  |  |  |  |  |  |  |                                                                                                                                                                                                                                                                                                                                                                                                                                                                                                                                                                                                                                                                                                                                                                                                                                |                                     |                     |      |           |             |     |           |                            |    |  |  |  |  |  |  |  |    |  |  |  |  |  |  |  |    |  |  |  |  |  |  |  |    |  |  |  |  |  |  |  |
| 4.                                                                                                                                                                                                                                                                                                                                                                                                                                                                                                                                                                                                                                                                                                                                                                                                                             |                                                                                                                                                    |                     |           |             |             |           |                            |                            |    |  |  |  |  |  |  |  |    |  |  |  |  |  |  |  |    |  |  |  |  |  |  |  |    |  |  |  |  |  |  |  |                                                                                                                                                                                                                                                                                                                                                                                                                                                                                                                                                                                                                                                                                                                                                                                                                                |                                     |                     |      |           |             |     |           |                            |    |  |  |  |  |  |  |  |    |  |  |  |  |  |  |  |    |  |  |  |  |  |  |  |    |  |  |  |  |  |  |  |
| Drug Name AND Form for this problem                                                                                                                                                                                                                                                                                                                                                                                                                                                                                                                                                                                                                                                                                                                                                                                            | Strength of product                                                                                                                                | Dose                | Frequency | No. of Rpts | OTC         | GP Supply | Drug status<br>New   Cont. |                            |    |  |  |  |  |  |  |  |    |  |  |  |  |  |  |  |    |  |  |  |  |  |  |  |    |  |  |  |  |  |  |  |                                                                                                                                                                                                                                                                                                                                                                                                                                                                                                                                                                                                                                                                                                                                                                                                                                |                                     |                     |      |           |             |     |           |                            |    |  |  |  |  |  |  |  |    |  |  |  |  |  |  |  |    |  |  |  |  |  |  |  |    |  |  |  |  |  |  |  |
| 1.                                                                                                                                                                                                                                                                                                                                                                                                                                                                                                                                                                                                                                                                                                                                                                                                                             |                                                                                                                                                    |                     |           |             |             |           |                            |                            |    |  |  |  |  |  |  |  |    |  |  |  |  |  |  |  |    |  |  |  |  |  |  |  |    |  |  |  |  |  |  |  |                                                                                                                                                                                                                                                                                                                                                                                                                                                                                                                                                                                                                                                                                                                                                                                                                                |                                     |                     |      |           |             |     |           |                            |    |  |  |  |  |  |  |  |    |  |  |  |  |  |  |  |    |  |  |  |  |  |  |  |    |  |  |  |  |  |  |  |
| 2.                                                                                                                                                                                                                                                                                                                                                                                                                                                                                                                                                                                                                                                                                                                                                                                                                             |                                                                                                                                                    |                     |           |             |             |           |                            |                            |    |  |  |  |  |  |  |  |    |  |  |  |  |  |  |  |    |  |  |  |  |  |  |  |    |  |  |  |  |  |  |  |                                                                                                                                                                                                                                                                                                                                                                                                                                                                                                                                                                                                                                                                                                                                                                                                                                |                                     |                     |      |           |             |     |           |                            |    |  |  |  |  |  |  |  |    |  |  |  |  |  |  |  |    |  |  |  |  |  |  |  |    |  |  |  |  |  |  |  |
| 3.                                                                                                                                                                                                                                                                                                                                                                                                                                                                                                                                                                                                                                                                                                                                                                                                                             |                                                                                                                                                    |                     |           |             |             |           |                            |                            |    |  |  |  |  |  |  |  |    |  |  |  |  |  |  |  |    |  |  |  |  |  |  |  |    |  |  |  |  |  |  |  |                                                                                                                                                                                                                                                                                                                                                                                                                                                                                                                                                                                                                                                                                                                                                                                                                                |                                     |                     |      |           |             |     |           |                            |    |  |  |  |  |  |  |  |    |  |  |  |  |  |  |  |    |  |  |  |  |  |  |  |    |  |  |  |  |  |  |  |
| 4.                                                                                                                                                                                                                                                                                                                                                                                                                                                                                                                                                                                                                                                                                                                                                                                                                             |                                                                                                                                                    |                     |           |             |             |           |                            |                            |    |  |  |  |  |  |  |  |    |  |  |  |  |  |  |  |    |  |  |  |  |  |  |  |    |  |  |  |  |  |  |  |                                                                                                                                                                                                                                                                                                                                                                                                                                                                                                                                                                                                                                                                                                                                                                                                                                |                                     |                     |      |           |             |     |           |                            |    |  |  |  |  |  |  |  |    |  |  |  |  |  |  |  |    |  |  |  |  |  |  |  |    |  |  |  |  |  |  |  |

|                                                                                                                                                                        |                                                                                                                                                                        |
|------------------------------------------------------------------------------------------------------------------------------------------------------------------------|------------------------------------------------------------------------------------------------------------------------------------------------------------------------|
| Procedures, other treatments, counselling this consult for this problem<br>1. _____ Prac Nurse? <input type="checkbox"/> 2. _____ Prac Nurse? <input type="checkbox"/> | Procedures, other treatments, counselling this consult for this problem<br>1. _____ Prac Nurse? <input type="checkbox"/> 2. _____ Prac Nurse? <input type="checkbox"/> |
|------------------------------------------------------------------------------------------------------------------------------------------------------------------------|------------------------------------------------------------------------------------------------------------------------------------------------------------------------|

|                                                                                        |                                                                                                                                             |                                                                                                                                                                              |
|----------------------------------------------------------------------------------------|---------------------------------------------------------------------------------------------------------------------------------------------|------------------------------------------------------------------------------------------------------------------------------------------------------------------------------|
| <b>NEW REFERRALS, ADMISSIONS</b><br>Problem(s)<br>1. _____ 1 2 3 4<br>2. _____ 1 2 3 4 | <b>IMAGING/Other tests</b><br>Body site      Problem(s)<br>1. _____ - _____ 1 2 3 4<br>2. _____ - _____ 1 2 3 4<br>3. _____ - _____ 1 2 3 4 | <b>PATHOLOGY</b><br>Problem(s)      PATHOLOGY (cont)      Problem(s)<br>1. _____ 1 2 3 4      4. _____ 1 2 3 4<br>2. _____ 1 2 3 4      5. _____ 1 2 3 4<br>3. _____ 1 2 3 4 |
|----------------------------------------------------------------------------------------|---------------------------------------------------------------------------------------------------------------------------------------------|------------------------------------------------------------------------------------------------------------------------------------------------------------------------------|

|                                                                                                                                                  |                                                                                                                                                                       |                                                                                                                                                                                                                                                       |                                                                                                                                                                                              |                                                                                                                                                                                                                                                                                                         |                                                                                                                                                                                                                                                                     |                                                                                                                                                                                                                                                                                                                                 |                                                                                       |                                                           |
|--------------------------------------------------------------------------------------------------------------------------------------------------|-----------------------------------------------------------------------------------------------------------------------------------------------------------------------|-------------------------------------------------------------------------------------------------------------------------------------------------------------------------------------------------------------------------------------------------------|----------------------------------------------------------------------------------------------------------------------------------------------------------------------------------------------|---------------------------------------------------------------------------------------------------------------------------------------------------------------------------------------------------------------------------------------------------------------------------------------------------------|---------------------------------------------------------------------------------------------------------------------------------------------------------------------------------------------------------------------------------------------------------------------|---------------------------------------------------------------------------------------------------------------------------------------------------------------------------------------------------------------------------------------------------------------------------------------------------------------------------------|---------------------------------------------------------------------------------------|-----------------------------------------------------------|
| Approx. how many times has this patient seen any GP in the past 12 months (including today)?<br>No: _____<br><input type="checkbox"/> Don't know | Does the patient have any chronic conditions/problems?<br>(Tick all that apply)<br><input type="checkbox"/> NO chronic problems in this patient → Go to last question | <b>Musculoskeletal</b><br><input type="checkbox"/> Osteoarthritis<br><input type="checkbox"/> Rheumatoid arthritis<br><input type="checkbox"/> Other arthritis<br><input type="checkbox"/> Osteoporosis<br><input type="checkbox"/> Chronic back pain | <b>Psychological</b><br><input type="checkbox"/> Depression<br><input type="checkbox"/> Anxiety<br><input type="checkbox"/> Insomnia<br><input type="checkbox"/> Dementia (incl Alzheimer's) | <b>Endocrine / nutritional</b><br><input type="checkbox"/> Hyperlipidaemia<br><input type="checkbox"/> Diabetes Type 1<br><input type="checkbox"/> Diabetes Type 2<br><input type="checkbox"/> Obesity (BMI ≥30)<br><input type="checkbox"/> Hypothyroidism<br><input type="checkbox"/> Hyperthyroidism | <b>Cardiovascular</b><br><input type="checkbox"/> Hypertension<br><input type="checkbox"/> IHD<br><input type="checkbox"/> CHF<br><input type="checkbox"/> Periph. Vasc. Dis<br><input type="checkbox"/> CVA/stroke<br><input type="checkbox"/> Atrial fibrillation | <b>Other chronic problems</b><br><input type="checkbox"/> Asthma<br><input type="checkbox"/> COPD<br><input type="checkbox"/> Sleep apnoea<br><input type="checkbox"/> Chronic renal failure<br><input type="checkbox"/> GORD<br><input type="checkbox"/> Glaucoma<br><input type="checkbox"/> Malignant neoplasm → Site: _____ | <b>Other chronic problems not listed: (please specify)</b><br>_____<br>_____<br>_____ | <b>FINISH Time</b><br><br>:<br>AM / PM<br>(please circle) |
|--------------------------------------------------------------------------------------------------------------------------------------------------|-----------------------------------------------------------------------------------------------------------------------------------------------------------------------|-------------------------------------------------------------------------------------------------------------------------------------------------------------------------------------------------------------------------------------------------------|----------------------------------------------------------------------------------------------------------------------------------------------------------------------------------------------|---------------------------------------------------------------------------------------------------------------------------------------------------------------------------------------------------------------------------------------------------------------------------------------------------------|---------------------------------------------------------------------------------------------------------------------------------------------------------------------------------------------------------------------------------------------------------------------|---------------------------------------------------------------------------------------------------------------------------------------------------------------------------------------------------------------------------------------------------------------------------------------------------------------------------------|---------------------------------------------------------------------------------------|-----------------------------------------------------------|
