# Supplementary material for: The prevalence of diagnosed chronic conditions and multimorbidity in Australia: A method for estimating population prevalence from general practice patient encounter data
Source: PubMed Central journal article supplement (PMC5344344; doi:10.1371/journal.pone.0172935), 2017-03-09
Supplement: pone.0172935.s003.pdf [file pone.0172935.s003.pdf]

# PLEASE READ CAREFULLY

The shaded section of the following forms asks questions about **PATIENT'S CHRONIC CONDITIONS / PROBLEMS**.  
 You may tear out this page as a guide to completing the following section of forms.

**START Time**

\_\_\_\_\_ : \_\_\_\_\_

AM / PM  
(please circle)

**Start time**

Record the time the consultation STARTED in hours and minutes and circle whether the time was AM or PM.

For example: 9:10

AM  PM  
(please circle)

**INSTRUCTIONS**

Answer these questions for **EACH** of the **next 30 PATIENTS** in the **order in which the patients are seen**.

Please **DO NOT** select patients to suit the topic being investigated.

Use your own knowledge, patient knowledge and your records as you see fit, in order to answer these questions.

**Finish time**

Record the time the consultation FINISHED in hours and minutes and circle whether the time was AM or PM.

For example: 9:28

AM  PM  
(please circle)

**Frequency of GP visits**

Please write the approximate **number of times (including today's visit)** the patient has **seen any GP for any reason** in the **past 12 months**. Use patient recall, and/or your notes or knowledge, to give the best estimate.

**Abbreviations**

BMI = body mass index  
 IHD = ischaemic heart disease  
 CHF = congestive heart failure  
 Periph Vasc Dis = peripheral vascular disease  
 CVA = cerebrovascular accident  
 COPD = chronic obstructive pulmonary disease (including emphysema)  
 GORD = gastro-oesophageal reflux disease

**Patient chronic conditions/problems**

The aim of these questions is to estimate the **prevalence** and **patterns** of **multimorbidity** in general practice patients. With an ageing population, the prevalence of multimorbidity is expected to increase and much of the care will fall on general practice. This study will highlight the complexity of multimorbidity and assist in planning for future health service needs.

If the patient has **NO chronic problems** please tick the box labelled '**NO chronic problems in this patient**', and go to the 'finish time' question.

If the patient **DOES** have **chronic conditions or problems**, please **use the tick boxes to indicate which ones** they have (irrespective of whether you have managed them today). Tick as many as apply.

If the patient has a **malignant neoplasm(s)** please **specify the primary site** of the neoplasm.

If the patient has any **other chronic problems or conditions** that are **not listed** please specify these in the '**Other chronic problems not listed**' section.

|                                                                                                                                                                        |                                                                                                                                                                                                    |                                                                                                                                                                                                                                                                                  |                                                                                                                                                                                                                     |                                                                                                                                                                                                                                                                                                                                        |                                                                                                                                                                                                                                                                                                   |                                                                                                                                                                                                                                                                                                                                                                    |                                                                                                          |                                                                                   |
|------------------------------------------------------------------------------------------------------------------------------------------------------------------------|----------------------------------------------------------------------------------------------------------------------------------------------------------------------------------------------------|----------------------------------------------------------------------------------------------------------------------------------------------------------------------------------------------------------------------------------------------------------------------------------|---------------------------------------------------------------------------------------------------------------------------------------------------------------------------------------------------------------------|----------------------------------------------------------------------------------------------------------------------------------------------------------------------------------------------------------------------------------------------------------------------------------------------------------------------------------------|---------------------------------------------------------------------------------------------------------------------------------------------------------------------------------------------------------------------------------------------------------------------------------------------------|--------------------------------------------------------------------------------------------------------------------------------------------------------------------------------------------------------------------------------------------------------------------------------------------------------------------------------------------------------------------|----------------------------------------------------------------------------------------------------------|-----------------------------------------------------------------------------------|
| <p><b>Approx. how many times has this patient seen any GP in the past 12 months (including today)?</b></p> <p>No: _____</p> <p><input type="checkbox"/> Don't know</p> | <p><b>Does the patient have any chronic conditions/problems?</b></p> <p>(Tick all that apply)</p> <p><input type="checkbox"/> <b>NO chronic problems in this patient</b> → Go to last question</p> | <p><b>Musculoskeletal</b></p> <p><input type="checkbox"/> Osteoarthritis</p> <p><input type="checkbox"/> Rheumatoid arthritis</p> <p><input type="checkbox"/> Other arthritis</p> <p><input type="checkbox"/> Osteoporosis</p> <p><input type="checkbox"/> Chronic back pain</p> | <p><b>Psychological</b></p> <p><input type="checkbox"/> Depression</p> <p><input type="checkbox"/> Anxiety</p> <p><input type="checkbox"/> Insomnia</p> <p><input type="checkbox"/> Dementia (incl Alzheimer's)</p> | <p><b>Endocrine / nutritional</b></p> <p><input type="checkbox"/> Hyperlipidaemia</p> <p><input type="checkbox"/> Diabetes Type 1</p> <p><input type="checkbox"/> Diabetes Type 2</p> <p><input type="checkbox"/> Obesity (BMI ≥30)</p> <p><input type="checkbox"/> Hypothyroidism</p> <p><input type="checkbox"/> Hyperthyroidism</p> | <p><b>Cardiovascular</b></p> <p><input type="checkbox"/> Hypertension</p> <p><input type="checkbox"/> IHD</p> <p><input type="checkbox"/> CHF</p> <p><input type="checkbox"/> Periph.Vasc. Dis</p> <p><input type="checkbox"/> CVA/stroke</p> <p><input type="checkbox"/> Atrial fibrillation</p> | <p><b>Other chronic problems</b></p> <p><input type="checkbox"/> Asthma</p> <p><input type="checkbox"/> COPD</p> <p><input type="checkbox"/> Sleep apnoea</p> <p><input type="checkbox"/> Chronic renal failure</p> <p><input type="checkbox"/> GORD</p> <p><input type="checkbox"/> Glaucoma</p> <p><input type="checkbox"/> Malignant neoplasm → Site: _____</p> | <p><b>Other chronic problems not listed: (please specify)</b></p> <p>_____</p> <p>_____</p> <p>_____</p> | <p><b>FINISH Time</b></p> <p>_____ : _____</p> <p>AM / PM<br/>(please circle)</p> |
|                                                                                                                                                                        |                                                                                                                                                                                                    |                                                                                                                                                                                                                                                                                  |                                                                                                                                                                                                                     |                                                                                                                                                                                                                                                                                                                                        |                                                                                                                                                                                                                                                                                                   |                                                                                                                                                                                                                                                                                                                                                                    |                                                                                                          |                                                                                   |
